# Supplementary material for: Associations of Alcohol and Tobacco Retail Outlet Rates with Neighborhood Disadvantage
Source: MDPI journal article supplement (doi:10.3390/ijerph19031134), 2022-01-20
Supplement: s1 [file s1]

# Supplemental Material

## Associations of Alcohol and Tobacco Retail Outlet Rates with Neighborhood Disadvantage

David C. Wheeler <sup>1,\*</sup>, Joseph Boyle <sup>1</sup>, D. Jeremy Barsell <sup>2</sup>, Trevin Glasgow <sup>2</sup>, F. Joseph McClernon <sup>3</sup>, Jason A. Oliver <sup>3,4,5</sup> and Bernard F. Fuemmeler <sup>2,6</sup>

<sup>1</sup> Department of Biostatistics, Virginia Commonwealth University, Richmond, VA 23298, USA; boylejr@vcu.edu

<sup>2</sup> Department of Health Behavior and Policy, Virginia Commonwealth University, Richmond, VA 23298, USA; barselltdj@vcu.edu (D.J.B.); trevin.glasgow@vcuhealth.org (T.G.); Bernard.fuemmeler@vcuhealth.org (B.F.F.)

<sup>3</sup> Department of Psychiatry and Behavioral Sciences, Duke University School of Medicine, Durham, NC 27705, USA; francis.mcclernon@duke.edu (F.J.M.); jason-oliver@ouhsc.edu (J.A.O.)

<sup>4</sup> Stephenson Cancer Center, University of Oklahoma Health Sciences Center, Oklahoma City, OK 73104, USA

<sup>5</sup> Department of Psychiatry and Behavioral Sciences, Oklahoma State University Center for Health Sciences, Tulsa, OK 74107, USA

<sup>6</sup> Massey Cancer Center, Virginia Commonwealth University, Richmond, VA 23298, USA

\* Correspondence: dcwheeler@vcu.edu; Tel.: +804-828-9827

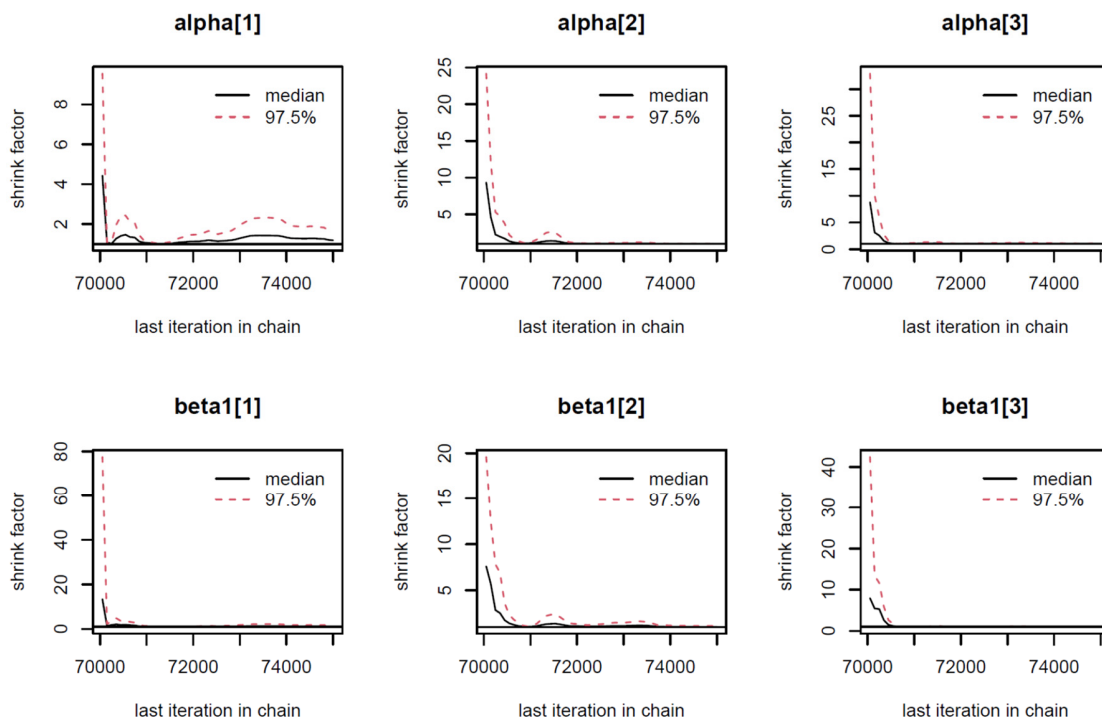

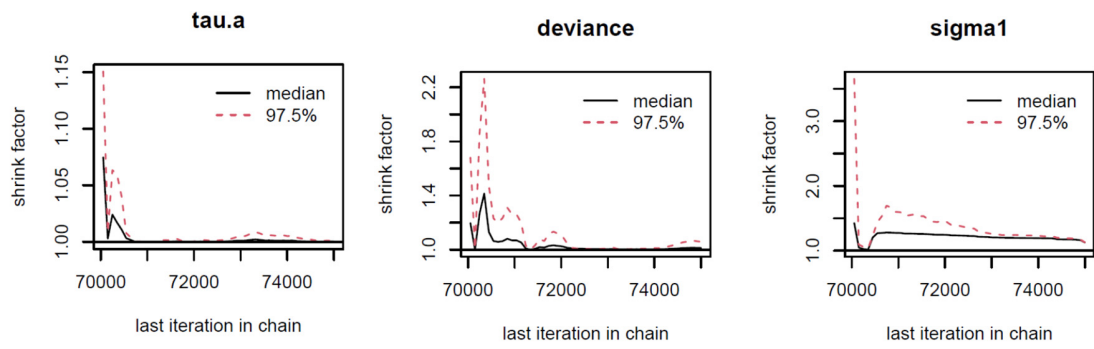

**Figure S1.** Gelman-Rubin convergence diagnostic plots for key model parameters.
